# Supplementary material for: One-step fabrication of nanostructured NiO films from deep eutectic solvent with enhanced electrochromic performance
Source: Royal Society of Chemistry journal article supplement (doi:10.1039/c3ta01055d), 2013-01-01
Supplement: c3ta01055d.pdf [file c3ta01055d.pdf]

## Supporting Information

### One-Step Fabrication of Nanostructured NiO Films from Deep Eutectic Solvent with Enhanced Electrochromic Performance

Guo-fa Cai<sup>1</sup>, Jiang-ping Tu<sup>\*1,2</sup>, Chang-dong Gu<sup>1,2</sup>, Jia-heng Zhang<sup>1</sup>, Jiao Chen<sup>1</sup>,  
Ding Zhou<sup>1</sup>, Shao-jun Shi<sup>1</sup>, Xiu-li Wang<sup>1,2</sup>

<sup>1</sup> State Key Laboratory of Silicon Materials, Key Laboratory of Advanced Materials and Applications for Batteries of Zhejiang Province and Department of Materials Science and Engineering, Zhejiang University, Hangzhou 310027, China

<sup>2</sup> Cyrus Tang Center for Sensor Materials and Applications, Zhejiang University, Hangzhou 310027, China

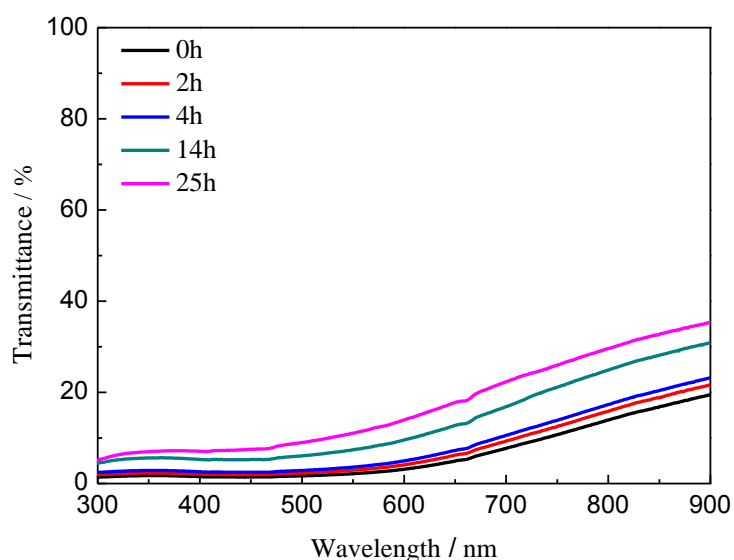

**Fig. S1** Evolution of the transmittance of NiO film electrodeposited at 90 °C after coloration.
